# Supplementary material
Source: PubMed Central journal article supplement (PMC6765128)
Supplement: develop-146-175315-s1.pdf [file develop-146-175315-s1.pdf]

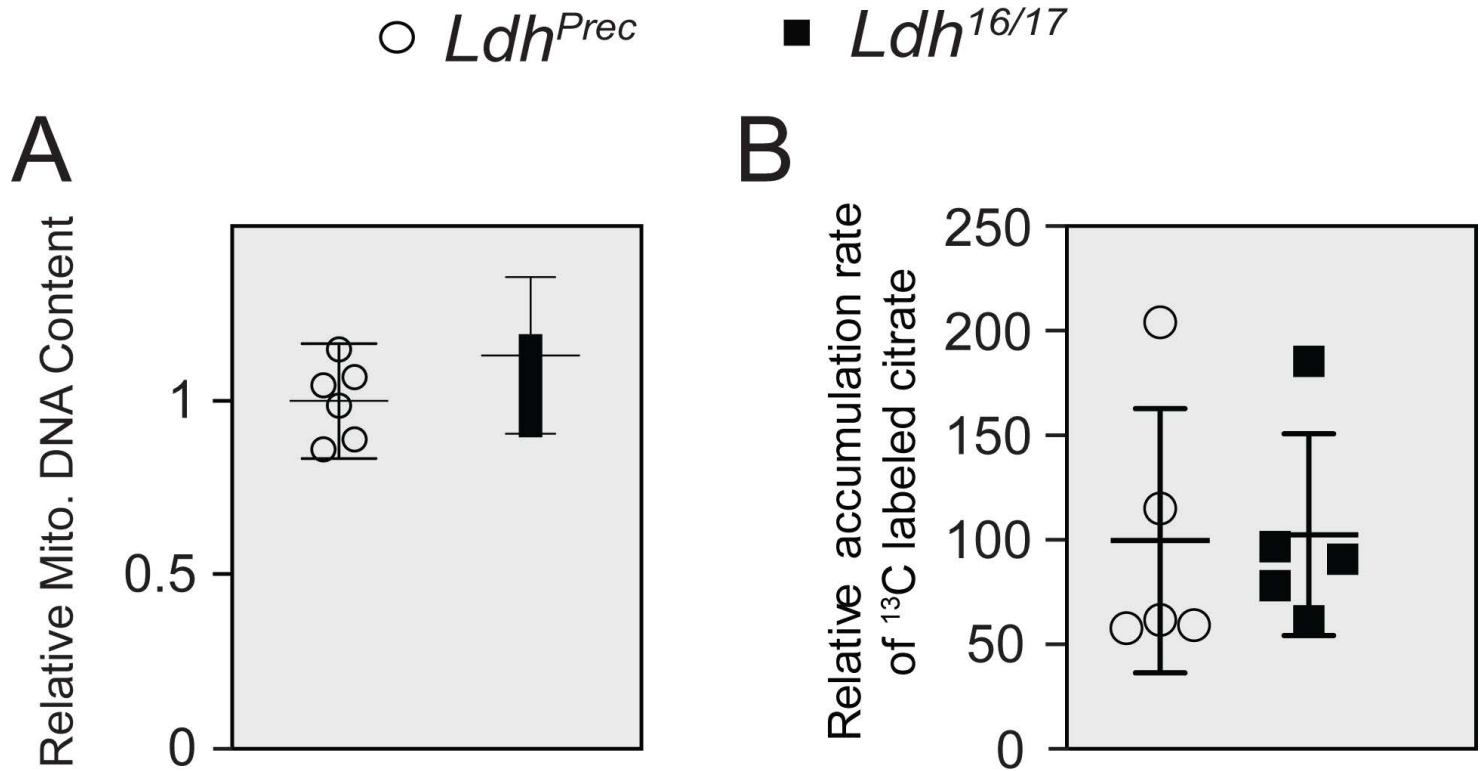

**Figure S1. Mitochondrial abundance and citrate synthesis are unaffected by *Ldh* mutations.** (A) The relative abundance of mitochondrial DNA is similar in *Ldh*<sup>pre</sup> controls and *Ldh*<sup>16/17</sup> mutants. Ratio is based on the abundance of *mt::Col* copy number relative to *Rpl32* copy number. *n* = 6. (B) The relative metabolic flux rates from <sup>13</sup>C<sub>6</sub>-glucose into citrate was measured in *Ldh*<sup>pre</sup> controls and *Ldh*<sup>16/17</sup> mutants. *n* = 5. (A,B) Error bars represent mean +/- one standard deviation.

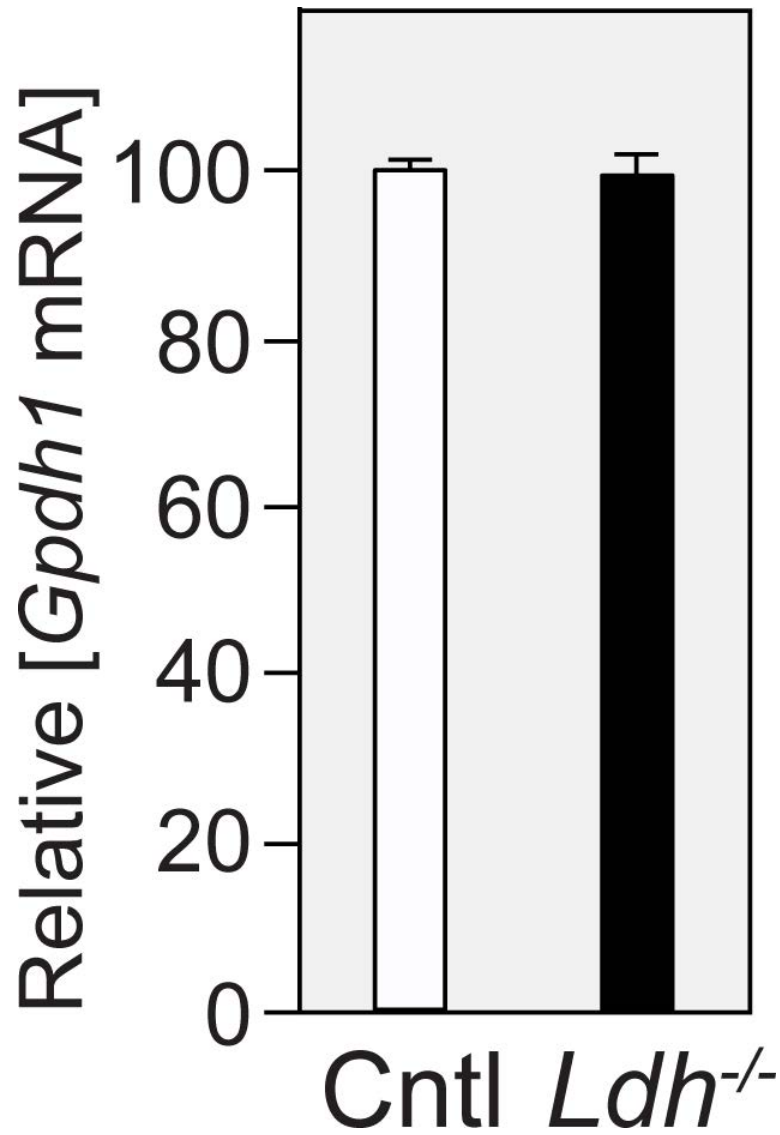

**Figure S2. *Ldh* mutants do not exhibit up-regulation of *Gpdh1* gene expression.** The abundance of *Gpdh1* mRNA in mid-L2 larvae were measured relative to *rp49* mRNA in *Ldh*<sup>prec</sup> controls and *Ldh*<sup>16/17</sup> mutants. n=3 independent biological samples. Error bars represent one standard deviation.

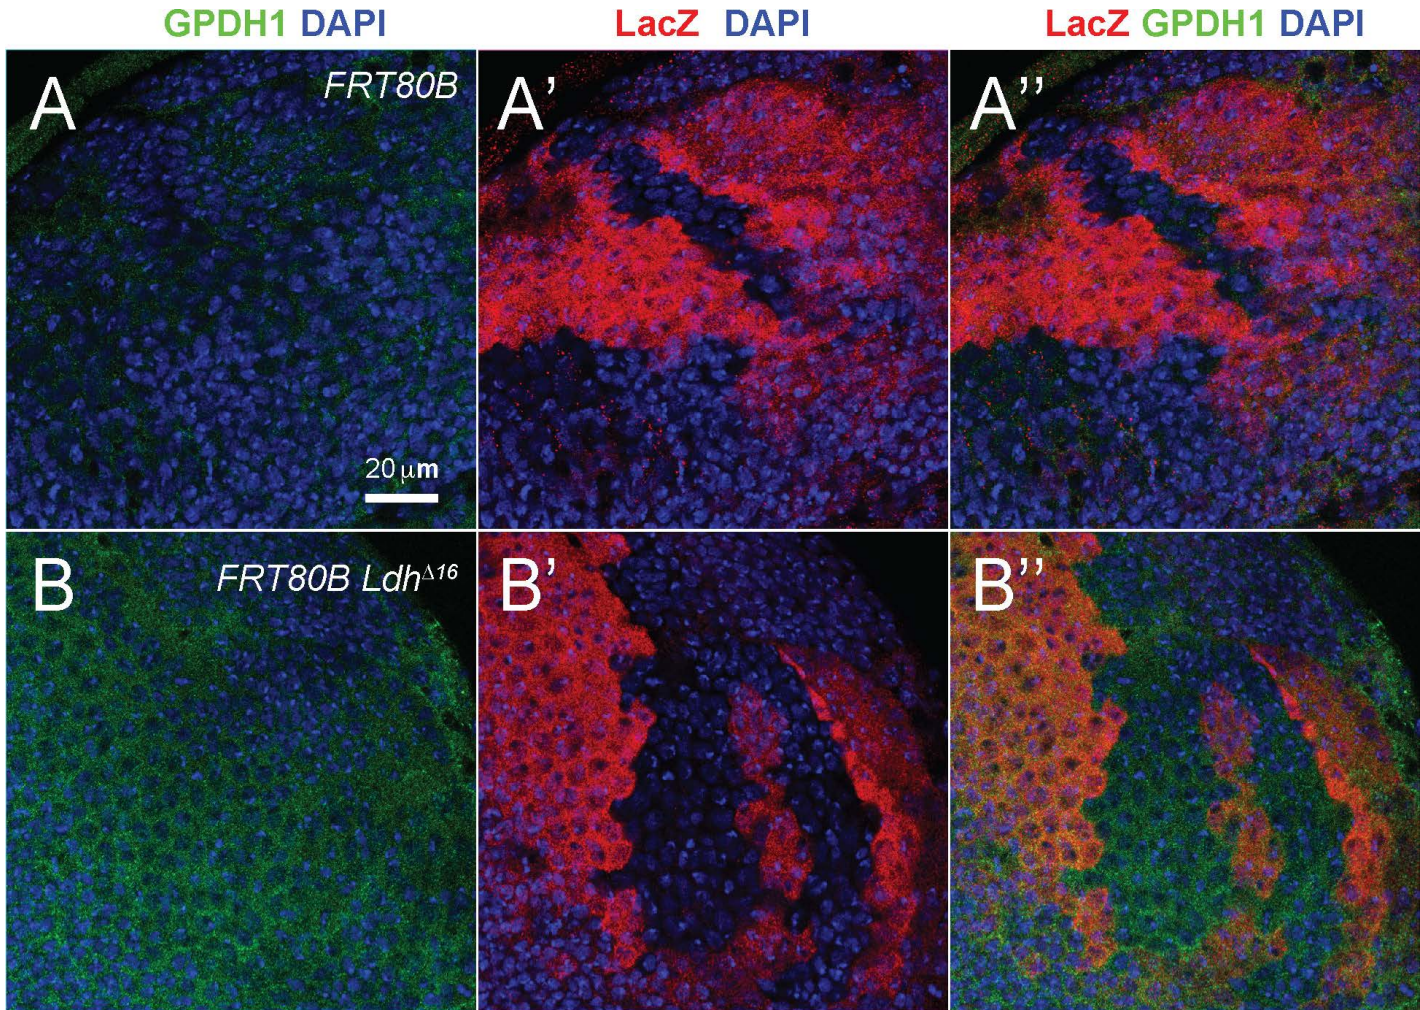

**Figure S3. GPDH1 enzyme expression is not increased in *Ldh* mutant cells.** CNS clones were generated in either (A) control (*FRT80B*) or (B) *Ldh*<sup>16</sup> heterozygous (*FRT80B Ldh*<sup>16</sup>) background. Tissues were stained with anti-GPDH1, anti-LacZ, and DAPI. (A' and B') Wild-type cells are indicated by increased LacZ staining. (B') Homozygous *Ldh*<sup>16</sup> cells lack LacZ staining. (B and B'') The intensity of anti-GPDH1 staining is similar in both wild-type and mutant cells. The scale bar in (A) applies to all panels.

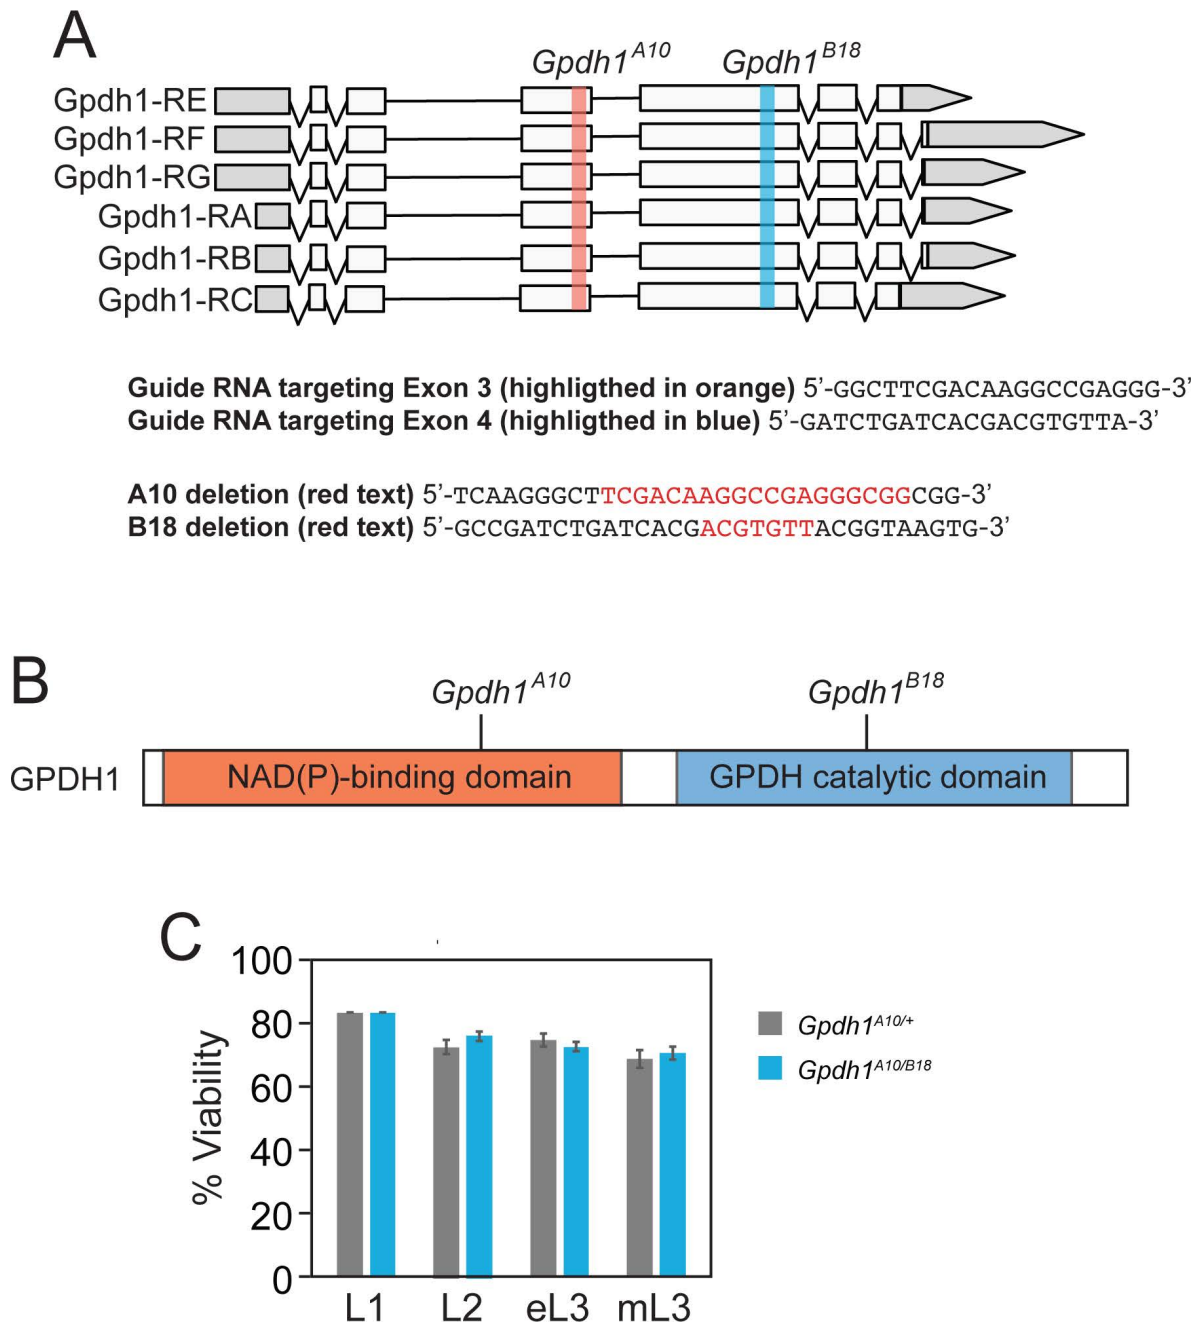

**Figure S4. Generation of *Gpdh1* mutants.** (A) A schematic diagram illustrating the *Gpdh1* locus, sequences targeted by guide RNA constructs, and sequence deleted by the *Gpdh1*<sup>A10</sup> and *Gpdh1*<sup>B18</sup> mutations, respectively. The guide RNA targeting exon 3 was used to generate *Gpdh1*<sup>A10</sup> and the guide RNA targeting exon 4 was used to generate *Gpdh1*<sup>B18</sup>. Deleted bases are highlighted in red. (B) A schematic diagram illustrating the location of the *Gpdh1*<sup>A10</sup> and *Gpdh1*<sup>B18</sup> mutations within the GPDH1 protein. (C) *Gpdh1*<sup>A10/+</sup>, and *Gpdh1*<sup>A10/B18</sup> mutants were analyzed for larval viability. Bars represent the percent of animals that survived from the previous developmental stage until the stage noted on the x-axis. Error bars represent standard deviation. n>100 larvae per timepoint.



**GPDH Actin DAPI**

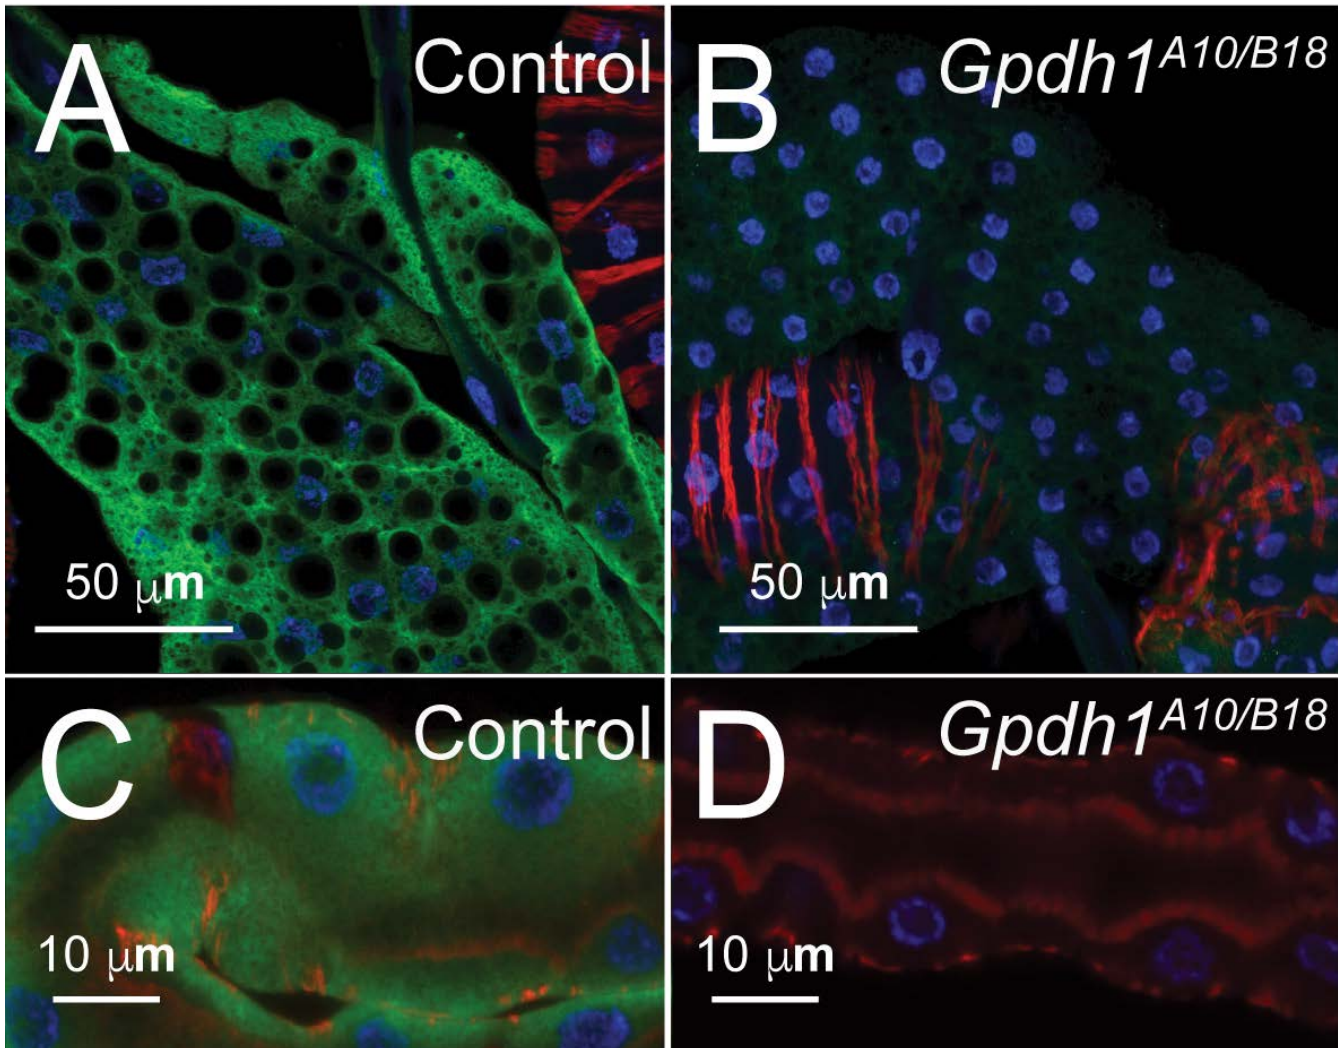

**Figure S5. *Gpdh1* mutants exhibit a significant decrease in Gpdh1 enzyme levels.** *w*<sup>1118</sup> controls and *w*<sup>1118</sup>; *Gpdh*<sup>A10/B18</sup> mutants were stained with an anti-GPDH1 antibody, phalloidin, and DAPI. (A-B) Representative images of stained fat bodies from (A) *w*<sup>1118</sup> controls and (B) *w*<sup>1118</sup>; *Gpdh*<sup>A10/B18</sup> mutants. (C-D) Representative images of stained Malpighian tubules from (C) *w*<sup>1118</sup> controls and (D) *w*<sup>1118</sup>; *Gpdh*<sup>A10/B18</sup> mutants.

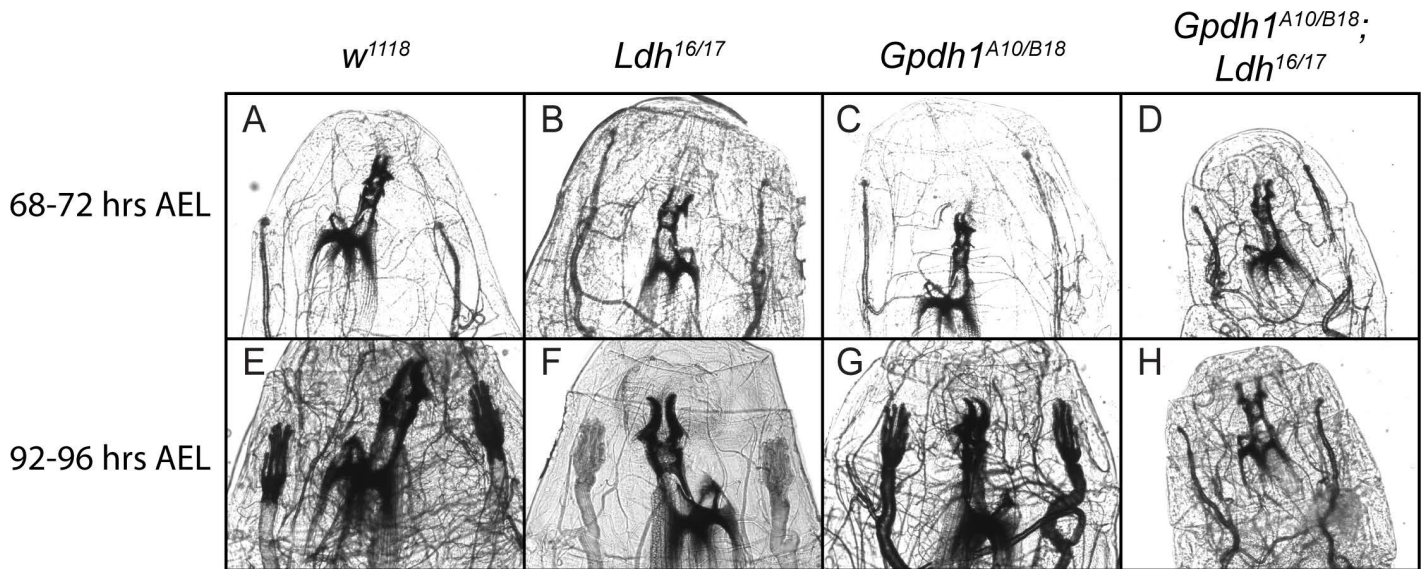

**Figure S6. Developmental Staging of  $Gpdh1^{A10/B18}; Ldh^{16/17}$  double mutant larvae.** The mouth hooks and anterior spiracles of  $w^{1118}$ ,  $Ldh^{16/17}$ ,  $Gpdh1^{A10/B18}$ , and  $Gpdh1^{A10/B18}; Ldh^{16/17}$  double mutant larvae that were imaged at either (A-D) 68-72 hours after egg-laying or (E-H) 92-96 hours after egg-laying. (A-D) For all genotypes, larvae collected 68-72 hours after egg-laying exhibited L2 morphology. (E-H)  $w^{1118}$ ,  $Ldh^{16/17}$ , and  $Gpdh1^{A10/B18}$  larvae collected 92-96 hours after egg-laying exhibited L3 morphology while  $Gpdh1^{A10/B18}; Ldh^{16/17}$  double mutants were still L2s.

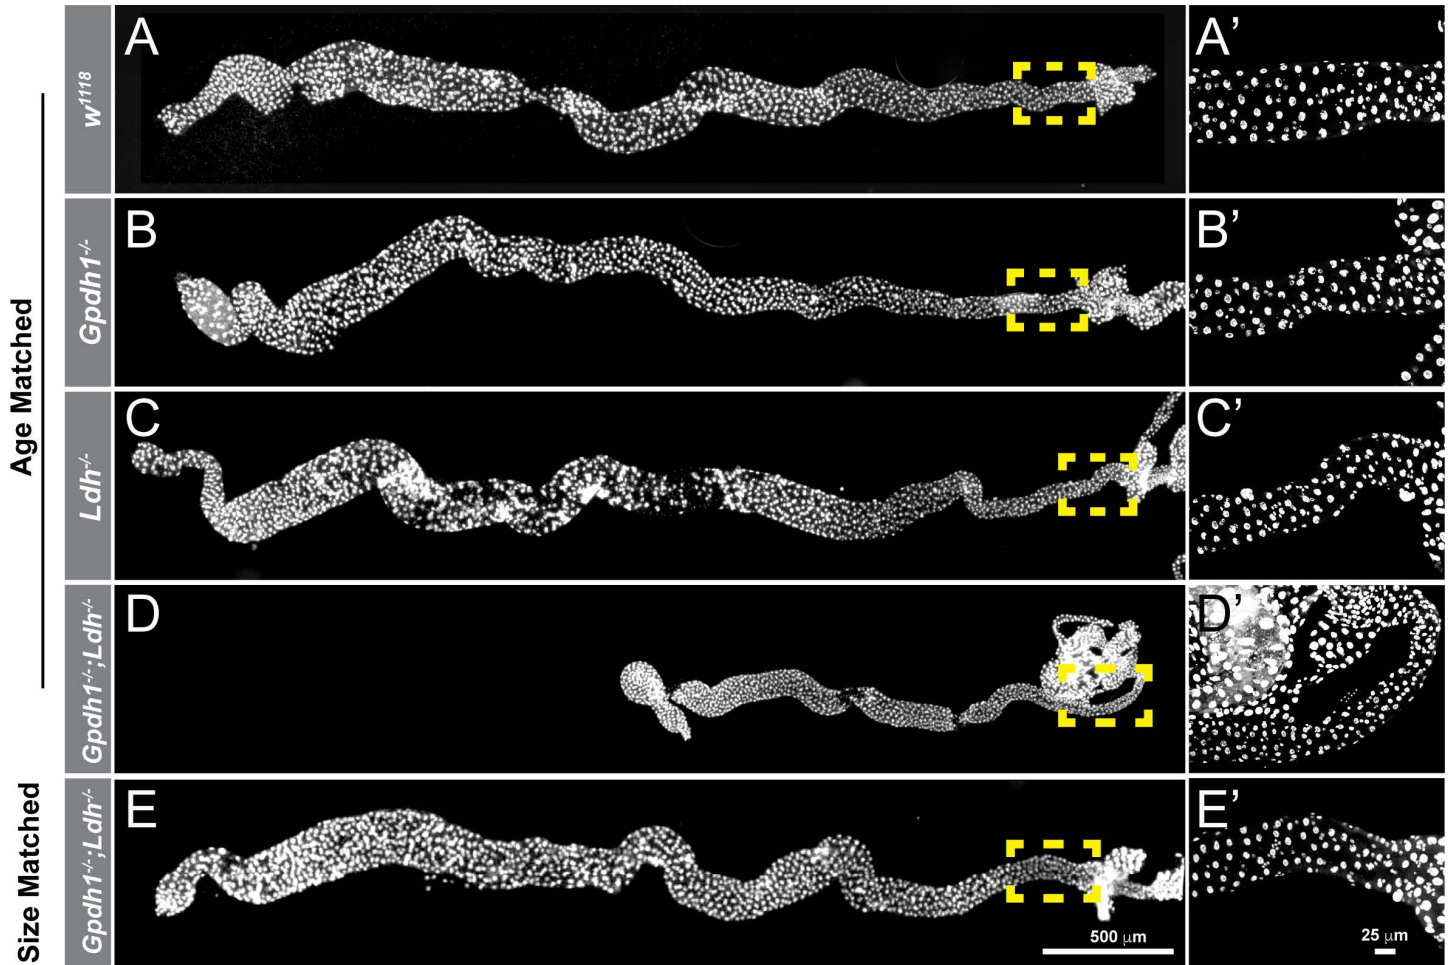

**Figure S7. The intestine of  $Gpdh^{A10/B18}; Ldh^{16/17}$  double mutant larvae exhibit growth defects** (A-E) L2 larval posterior midguts (PMGs) stained for DAPI (gray) from (A)  $w^{1118}$  controls, (B)  $Gpdh1^{A10/B18}$  mutants, (C)  $Ldh^{16/17}$  mutants, (D) age-matched  $Gpdh1^{A10/B18}; Ldh^{16/17}$  double mutants, and (E) size-matched  $Gpdh1^{A10/B18}; Ldh^{16/17}$  double mutants. (A'-E') Magnified images of the outlined regions in A-E. The scale bars in (E) and (E') apply to (A-E) and (A'-E'), respectively.

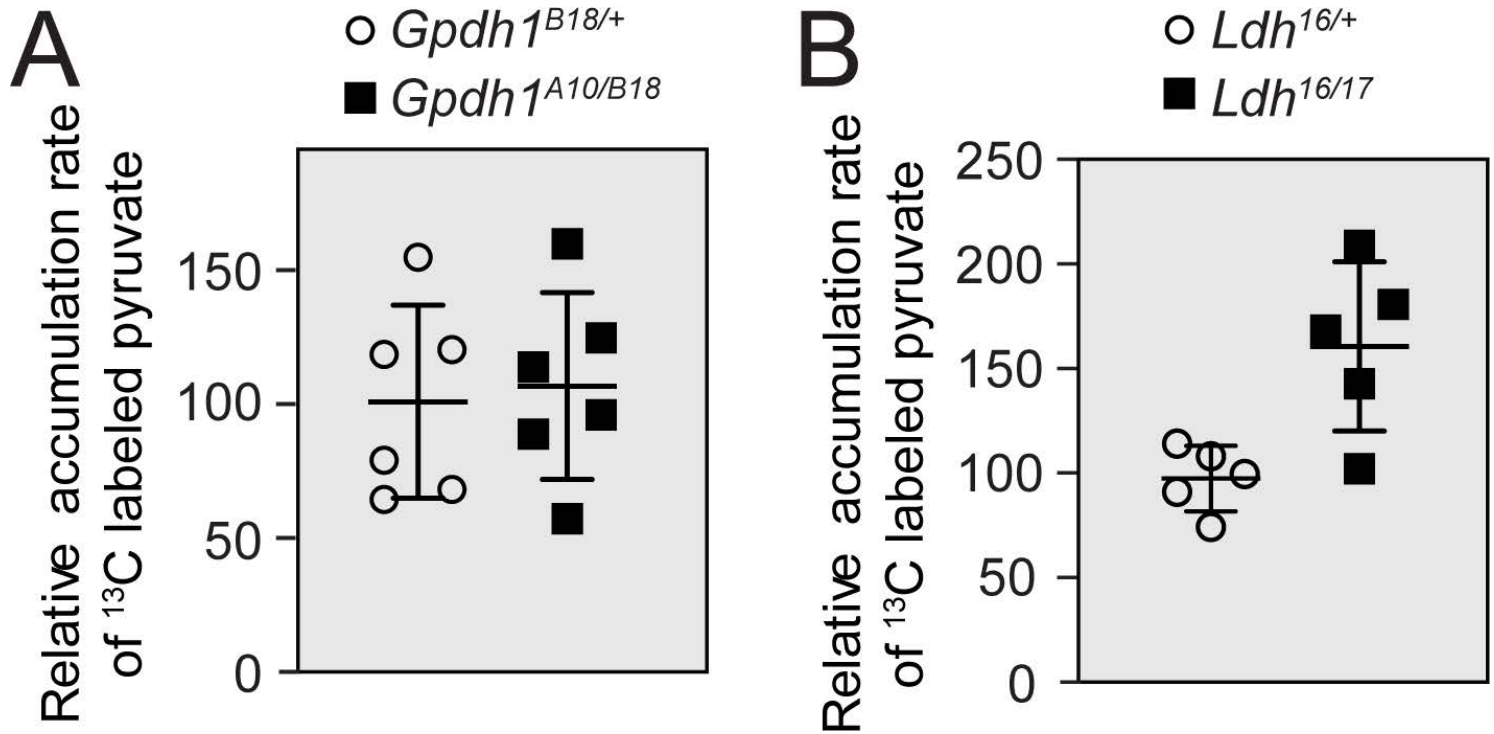

**Figure S8. *Gpdh1* and *Ldh* mutants exhibit normal rates of pyruvate accumulation.** The relative metabolic flux rate from <sup>13</sup>C<sub>6</sub>-glucose into pyruvate was measured in (A) *Gpdh1*<sup>A10/B18</sup> mutant L2 larvae compared to *Gpdh1*<sup>B18/+</sup> controls and (B) *Ldh*<sup>16/17</sup> mutant L2 larvae compared to *Ldh*<sup>16/+</sup> controls. For all panels, error bars represent one standard deviation. (A) n=6 biological replicates. (B) n=5 biological replicates. The increased abundance observed in (B) is not significant.



**Table S1. Summary of LC-MS analysis of *Ldh* mutants and precise excision controls.** n= number of independent samples analyzed per genotype in the experiments. Each sample contained 100 mid-L2 larvae.

[Click here to Download Table S1](#)

**Table S2. Absolute abundance of TAG, glycogen, and trehalose in *Ldh* mutants and precise excision controls.** Data represented in Figure 1C.

[Click here to Download Table S2](#)

**Table S3. Summary of GC-MS metabolomic analyses (*Ldh* mutants vs Precise excision controls).** Individual trials consist of 6 independent samples per genotype. Each sample contains 25 mid-second instar larvae. Highlighted values indicate a minimum 2-fold change and a p-value of 0.01. Data for all samples are available in the Supplemental Results.

[Click here to Download Table S3](#)

**Table S4. GC-MS analysis of *Ldh* mutants and precise excision controls (Trial 1).**  
All values normalized to sample mass and a d-4-succinic acid standard. n=6 samples per genotype; 25 mid-L2 larvae per sample.

[Click here to Download Table S4](#)

**Table S5. GC-MS analysis of *Ldh* mutants and precise excision controls (Trial 2).**  
All values normalized to sample mass and a d-4-succinic acid standard. n=6 samples per genotype; 25 mid-L2 larvae per sample.

[Click here to Download Table S5](#)

**Table S6. GC-MS analysis of *Ldh* mutants and precise excision controls (Trial 3).**  
All values normalized to sample mass and a d-4-succinic acid standard. n=6 samples per genotype; 25 mid-L2 larvae per sample.

[Click here to Download Table S6](#)

**Table S7. GC-MS analysis of *Ldh* mutants and precise excision controls (Trial 4).** All values normalized to sample mass and a d-4-succinic acid standard. n=6 samples per genotype; 25 mid-L2 larvae per sample.

[Click here to Download Table S7](#)

**Table S8. GC-MS analysis of *Gpdh1*[A10/+] heterozygous controls and *Gpdh1*[A10/B18] mutants.** All values normalized to sample mass and a d-4-succinic acid standard. n=6 samples per genotype; 25 mid-L2 larvae per sample.

[Click here to Download Table S8](#)

**Table S9. GC-MS analysis of *Gpdh1*[A10/+]; *Ldh*[16/+] heterozygous controls and *Gpdh1*[A10/B18]; *Ldh*[16/17] mutants.** All values normalized to sample mass and a d-4-succinic acid standard. n=6 samples per genotype; 25 mid-L2 larvae per sample.

[Click here to Download Table S9](#)
